# Supplementary material
Source: PubMed Central journal article supplement (PMC3302660)
Supplement: NIHMS358557-supplement-online_appendix.pdf [file NIHMS358557-supplement-online_appendix.pdf]

**APPENDIX**

**A1. Multilevel Multinomial Logistic Regression Results (Coefficients) of Relationship-Specific Type of Contraceptive Method Used at Last Sex, Effects of Relationship and Individual Characteristics, Add Health, Wave III (2001-2002), Women**

| Relationship Characteristics                                | Condom<br>vs.<br>None    | Hormonal<br>vs.<br>None | Dual<br>vs.<br>None   | Hormonal<br>vs.<br>Condom | Dual<br>vs.<br>Condom   | Hormonal<br>vs.<br>Dual |
|-------------------------------------------------------------|--------------------------|-------------------------|-----------------------|---------------------------|-------------------------|-------------------------|
| Relationship commitment (ref: Stranger hook-ups)            |                          |                         |                       |                           |                         |                         |
| Friend/acquaintance hook-ups                                | 0.344*                   | 0.690**                 | 0.258                 | 0.377                     | -0.062                  | 0.383                   |
| Dating with less sex                                        | 0.280*                   | 1.068*** <sup>a</sup>   | 0.663*** <sup>a</sup> | 0.789*** <sup>a</sup>     | 0.406*** <sup>a</sup>   | 0.333                   |
| Dating with more sex                                        | -0.261 <sup>ab</sup>     | 1.431*** <sup>ab</sup>  | 0.350* <sup>b</sup>   | 1.808*** <sup>ab</sup>    | 0.753*** <sup>ab</sup>  | 1.053*** <sup>ab</sup>  |
| Serious dating/cohabiting                                   | -0.761*** <sup>abc</sup> | 1.491*** <sup>ab</sup>  | -0.001 <sup>bc</sup>  | 2.524*** <sup>abc</sup>   | 1.064*** <sup>abc</sup> | 1.542*** <sup>abc</sup> |
| Age difference (ref: Partner within 2 years)                |                          |                         |                       |                           |                         |                         |
| Partner 3+ years older                                      | -0.236**                 | -0.215*                 | -0.418***             | -0.004                    | -0.199*                 | 0.246*                  |
| Partner 3+ years younger                                    | -0.073                   | -0.200                  | -0.304                | -0.235                    | -0.327                  | 0.090                   |
| Racial/ethnic difference (ref: Partner same race/ethnicity) |                          |                         |                       |                           |                         |                         |
| Partner different race/ethnicity                            | 0.027                    | -0.397**                | -0.027                | -0.501***                 | -0.156                  | -0.357*                 |
| Current status (ref: Past)                                  |                          |                         |                       |                           |                         |                         |
| Current                                                     | -0.274*                  | 0.950***                | 0.033                 | 1.385***                  | 0.451***                | 1.022***                |
| Pregnancy history (ref: No)                                 |                          |                         |                       |                           |                         |                         |
| Yes                                                         | -1.567***                | -1.539***               | -1.326***             | 0.275                     | 0.471***                | -0.169                  |

(continued)

Contraceptive Method Choice among Youth in the United States

(Table A1, continued)

|                                          | Condom<br>vs.<br>None | Hormonal<br>vs.<br>None | Dual<br>vs.<br>None | Hormonal<br>vs.<br>Condom | Dual<br>vs.<br>Condom | Hormonal<br>vs.<br>Dual |
|------------------------------------------|-----------------------|-------------------------|---------------------|---------------------------|-----------------------|-------------------------|
| <b>Individual-level Characteristics</b>  |                       |                         |                     |                           |                       |                         |
| Age at beginning (ref: 19-20 years)      |                       |                         |                     |                           |                       |                         |
| 15-16 years                              | 0.416*                | 0.162                   | 0.460*              | -0.550**                  | -0.257                | -0.238                  |
| 17-18 years                              | 0.064*                | -0.282*                 | 0.112               | -0.379**                  | 0.016                 | -0.414**                |
| 21-22 years                              | -0.099                | 0.086                   | -0.189              | 0.242*                    | -0.022                | 0.270*                  |
| ≥ 23 years                               | -0.222                | 0.060                   | -0.286              | 0.352*                    | 0.012                 | 0.273                   |
| Race/ethnicity (ref: White)              |                       |                         |                     |                           |                       |                         |
| Black                                    | 0.993*                | -0.245                  | 0.923***            | -1.554***                 | -0.416**              | -1.126***               |
| Hispanic                                 | -0.085                | -0.585*                 | 0.449               | -0.523*                   | -0.381                | -0.137                  |
| Asian                                    | 0.185                 | -0.218                  | -1.005*             | 0.593                     | -1.376***             | 1.286**                 |
| Nativity status (ref: US born)           |                       |                         |                     |                           |                       |                         |
| Foreign born                             | 0.156                 | 0.262                   | 0.260               | 0.028                     | -0.020                | -0.001                  |
| Religious denomination (ref: Protestant) |                       |                         |                     |                           |                       |                         |
| No denomination                          | 0.395*                | 0.545***                | 0.538***            | 0.299*                    | 0.286                 | -0.089                  |
| Catholic                                 | 0.412**               | 0.235                   | 0.563***            | -0.170                    | 0.179                 | -0.404*                 |
| Non-Christian/Other                      | 0.354                 | 0.542*                  | 0.386               | 0.306                     | 0.182                 | 0.071                   |
| Religiosity                              | 0.059                 | -0.035                  | -0.029              | -0.118                    | -0.115                | -0.036                  |
| Family structure (ref: Two parents)      |                       |                         |                     |                           |                       |                         |
| Biological mother only                   | 0.561                 | -0.373                  | 0.611               | -0.982*                   | -0.011                | -0.981*                 |
| Biological father only                   | 0.252                 | 1.327*                  | 0.583               | 1.177*                    | 0.320                 | 0.857                   |
| Other situations                         | 0.705                 | 1.117*                  | 1.365**             | 0.763                     | 0.934*                | -0.371                  |

(continued)

Contraceptive Method Choice among Youth in the United States

(Table A1, continued)

|                                     | Condom<br>vs.<br>None | Hormonal<br>vs.<br>None | Dual<br>vs.<br>None | Hormonal<br>vs.<br>Condom | Dual<br>vs.<br>Condom | Hormonal<br>vs.<br>Dual |
|-------------------------------------|-----------------------|-------------------------|---------------------|---------------------------|-----------------------|-------------------------|
| Parental education                  |                       |                         |                     |                           |                       |                         |
| Maternal education                  | 0.047                 | 0.138***                | 0.073*              | 0.114***                  | 0.044                 | 0.049                   |
| Paternal education                  | 0.048                 | -0.018                  | 0.051               | -0.070*                   | -0.002                | -0.065*                 |
| (ln) Household income               | 0.092                 | 0.316**                 | 0.120               | 0.240**                   | 0.044                 | 0.164                   |
| Age at first sex (ref: 15-17 years) |                       |                         |                     |                           |                       |                         |
| 14 years or younger                 | -0.598***             | -0.753***               | -0.912***           | -0.222                    | -0.359*               | 0.324                   |
| 18 years or older                   | 0.427**               | 0.330*                  | 0.498***            | -0.161                    | -0.036                | -0.272                  |
| Perceived risk of pregnancy or AIDS | 0.081                 | -0.024                  | 0.100               | -0.080                    | 0.033                 | -0.137*                 |
| Perceived severity of pregnancy     | 0.151**               | 0.099                   | 0.233***            | -0.051                    | 0.077                 | -0.198**                |
| Contraceptive self-efficacy         | 0.101                 | 0.156*                  | 0.223***            | 0.092                     | 0.150**               | -0.161*                 |
| Prior Relationship Experiences      |                       |                         |                     |                           |                       |                         |
| Number of prior relationships       | 0.007                 | -0.124***               | -0.189***           | -0.077***                 | -0.139***             | 0.027                   |
| Hormonal use in prior relationships | -0.953***             | 1.588***                | 1.918***            | 1.990***                  | 2.327***              | 0.233                   |
| Pregnancy in prior relationships    | 0.086                 | -0.490**                | -0.533***           | -0.577***                 | -0.599***             | -0.186                  |
| Intercept                           | -0.621                | -3.951***               | -2.426***           | -3.339***                 | -1.738***             | -0.764                  |

Note: Weighted results. N=3,096 women and 8,736 relationships.

<sup>a</sup> Significantly different from friend/acquaintance hook-ups at  $p < 0.05$ .

<sup>b</sup> Significantly different from dating with less sex at  $p < 0.05$ .

<sup>c</sup> Significantly different from dating with more sex at  $p < 0.05$ .

\*  $p < .05$ ; \*\*  $p < .01$ ; \*\*\*  $p < .001$

Contraceptive Method Choice among Youth in the United States

**A2. Multilevel Multinomial Logistic Regression Results (Coefficients) of Relationship-Specific Type of Contraceptive Method Used at Last Sex, Effects of Relationship and Individual Characteristics, Add Health, Wave III (2001-2002), Men**

| Relationship Characteristics                                | Condom<br>vs.<br>None  | Hormonal<br>vs.<br>None | Dual<br>vs.<br>None    | Hormonal<br>vs.<br>Condom | Dual<br>vs.<br>Condom   | Hormonal<br>vs.<br>Dual |
|-------------------------------------------------------------|------------------------|-------------------------|------------------------|---------------------------|-------------------------|-------------------------|
| Relationship commitment (ref: Stranger hook-ups)            |                        |                         |                        |                           |                         |                         |
| Friend/acquaintance hook-ups                                | -0.247*                | 0.263                   | -0.011                 | 0.526**                   | 0.306                   | 0.219                   |
| Dating with less sex                                        | 0.427*** <sup>a</sup>  | 1.111*** <sup>a</sup>   | 0.824*** <sup>a</sup>  | 0.692***                  | 0.453**                 | 0.177                   |
| Dating with more sex                                        | -0.419*** <sup>b</sup> | 1.044*** <sup>a</sup>   | 0.474*** <sup>ab</sup> | 1.679*** <sup>ab</sup>    | 1.163*** <sup>ab</sup>  | 0.356                   |
| Serious dating/cohabiting                                   | 0.553*** <sup>ab</sup> | 1.722*** <sup>abc</sup> | 0.754*** <sup>ac</sup> | 2.553*** <sup>abc</sup>   | 1.626*** <sup>abc</sup> | 0.765*** <sup>abc</sup> |
| Age difference (ref: Partner within 2 years)                |                        |                         |                        |                           |                         |                         |
| Partner 3+ years older                                      | -0.460***              | -0.364*                 | -0.629***              | 0.117                     | -0.146                  | 0.212                   |
| Partner 3+ years younger                                    | -0.037                 | -0.333*                 | -0.615***              | -0.285*                   | -0.593***               | 0.343*                  |
| Racial/ethnic difference (ref: Partner same race/ethnicity) |                        |                         |                        |                           |                         |                         |
| Partner different race/ethnicity                            | -0.018                 | -0.056                  | 0.053                  | -0.074                    | 0.042                   | -0.104                  |
| Current status (ref: Past)                                  |                        |                         |                        |                           |                         |                         |
| Current                                                     | -0.377***              | 0.886***                | 0.203                  | 1.432***                  | 0.771***                | 0.666***                |
| Pregnancy history (ref: No)                                 |                        |                         |                        |                           |                         |                         |
| Yes                                                         | -1.297***              | -1.346***               | -1.520***              | 0.110                     | -0.077                  | 0.370                   |

(continued)

Contraceptive Method Choice among Youth in the United States

(Table A2, continued)

|                                          | Condom<br>vs.<br>None | Hormonal<br>vs.<br>None | Dual<br>vs.<br>None | Hormonal<br>vs.<br>Condom | Dual<br>vs.<br>Condom | Hormonal<br>vs.<br>Dual |
|------------------------------------------|-----------------------|-------------------------|---------------------|---------------------------|-----------------------|-------------------------|
| <b>Individual-level Characteristics</b>  |                       |                         |                     |                           |                       |                         |
| Age at beginning (ref: 19-20 years)      |                       |                         |                     |                           |                       |                         |
| 15-16 years                              | -0.004                | -0.237                  | -0.185              | -0.327                    | -0.242                | -0.032                  |
| 17-18 years                              | 0.004                 | -0.117                  | 0.041               | -0.200                    | -0.062                | -0.133                  |
| 21-22 years                              | -0.123                | 0.142                   | -0.043              | 0.250*                    | 0.064                 | 0.135                   |
| ≥ 23 years                               | 0.078                 | 0.109                   | -0.294              | -0.063                    | -0.481**              | 0.378                   |
| Race/ethnicity (ref: White)              |                       |                         |                     |                           |                       |                         |
| Black                                    | 0.911***              | -0.577**                | 0.623***            | -1.683***                 | -0.502**              | -1.318***               |
| Hispanic                                 | 0.455*                | -0.374                  | -0.277              | -1.004***                 | -0.949***             | 0.053                   |
| Asian                                    | 0.451                 | -0.140                  | -0.338              | -0.868**                  | -1.032**              | 0.221                   |
| Nativity status (ref: US born)           |                       |                         |                     |                           |                       |                         |
| Foreign born                             | -0.238                | -0.436                  | -0.813*             | -0.318                    | -0.763*               | 0.626                   |
| Religious denomination (ref: Protestant) |                       |                         |                     |                           |                       |                         |
| No denomination                          | 0.437**               | 0.115                   | -0.037              | -0.393*                   | -0.553***             | 0.294                   |
| Catholic                                 | 0.057                 | 0.250                   | -0.045              | 0.202                     | -0.085                | 0.190                   |
| Non-Christian/Other                      | 0.386                 | 0.059                   | 0.187               | -0.488*                   | -0.331                | 0.056                   |
| Religiosity                              | 0.065                 | 0.039                   | -0.010              | -0.082                    | -0.138*               | 0.122                   |
| Family structure (ref: Two parents)      |                       |                         |                     |                           |                       |                         |
| Biological mother only                   | -0.813*               | -0.075                  | -1.544***           | 0.935*                    | -0.545                | 1.609**                 |
| Biological father only                   | 1.512***              | 1.452**                 | 0.704               | 0.014                     | -0.801                | 0.632                   |
| Other situations                         | 0.412                 | 1.130*                  | -0.310              | 0.887                     | -0.589                | 1.335*                  |

(continued)

Contraceptive Method Choice among Youth in the United States

(Table A2, continued)

|                                     | Condom<br>vs.<br>None | Hormonal<br>vs.<br>None | Dual<br>vs.<br>None | Hormonal<br>vs.<br>Condom | Dual<br>vs.<br>Condom | Hormonal<br>vs.<br>Dual |
|-------------------------------------|-----------------------|-------------------------|---------------------|---------------------------|-----------------------|-------------------------|
| Parental education                  |                       |                         |                     |                           |                       |                         |
| Maternal education                  | 0.114***              | 0.123***                | 0.091**             | 0.002                     | -0.033                | 0.014                   |
| Paternal education                  | -0.055*               | 0.004                   | -0.101***           | 0.071*                    | -0.034                | 0.114**                 |
| (ln) Household income               | 0.022                 | 0.029                   | 0.018               | 0.031                     | 0.023                 | 0.035                   |
| Age at first sex (ref: 15-17 years) |                       |                         |                     |                           |                       |                         |
| 14 years or younger                 | -0.219                | -0.117                  | -0.022              | 0.121                     | 0.255                 | 0.006                   |
| 18 years or older                   | 0.746***              | 0.721***                | 1.025***            | -0.060                    | 0.215                 | -0.431**                |
| Perceived risk of pregnancy or AIDS | 0.112*                | -0.043                  | 0.209***            | -0.166**                  | 0.072                 | -0.279***               |
| Perceived severity of pregnancy     | 0.125*                | 0.196**                 | 0.011               | 0.053                     | -0.140*               | 0.278***                |
| Contraceptive self-efficacy         | 0.230***              | 0.293***                | 0.273***            | 0.021                     | 0.005                 | -0.026                  |
| Prior Relationship Experiences      |                       |                         |                     |                           |                       |                         |
| Number of prior relationships       | -0.005                | -0.047*                 | -0.145***           | 0.013                     | -0.083***             | 0.022                   |
| Hormonal use in prior relationships | -0.487***             | 0.774***                | 1.159***            | 0.685***                  | 1.084***              | 0.389**                 |
| Pregnancy in prior relationships    | -0.457**              | -1.014***               | -1.087***           | -0.285                    | -0.426                | 0.111                   |
| Intercept                           | 0.070                 | -3.366***               | -0.574              | -3.474***                 | -0.677                | -2.032***               |

Note: Weighted results. N=2,874 men and 7,929 relationships.

<sup>a</sup> Significantly different from friend/acquaintance hook-ups at  $p < 0.05$ .

<sup>b</sup> Significantly different from dating with less sex at  $p < 0.05$ .

<sup>c</sup> Significantly different from dating with more sex at  $p < 0.05$ .

\*  $p < .05$ ; \*\*  $p < .01$ ; \*\*\*  $p < .001$
